# Supplementary material for: Effect of transcutaneous electrical acupoint stimulation on remifentanil dosage during craniotomy aneurysm clipping: a prospective, randomized controlled study
Source: BMC Complement Med Ther. 2023 Dec 13;23:453. doi: 10.1186/s12906-023-04297-x (PMC10717748; doi:10.1186/s12906-023-04297-x)
Supplement: Supplementary file 1 — Supplementary Material 1 [file 12906_2023_4297_MOESM1_ESM.zip]

Archive with 3 entries (3 files):
- 12906_2023_4297_ReviewerReport_V1_R1.docx
- 12906_2023_4297_ReviewerReport_V1_R2.docx
- 12906_2023_4297_ReviewerReport_V2_R1.docx
